# Supplementary material for: Fabrication of the ternary heterojunction Cd0.5Zn0.5S@UIO-66@g-C3N4 for enhanced visible-light photocatalytic hydrogen evolution and degradation of organic pollutants
Source: Royal Society of Chemistry journal article supplement (doi:10.1039/c7qi00638a), 2017-11-27
Supplement: c7qi00638a1.pdf [file c7qi00638a1.pdf]

**Fabrication of ternary heterojunction  $\text{Cd}_{0.5}\text{Zn}_{0.5}\text{S}@ \text{UIO-66@g-C}_3\text{N}_4$   
for enhanced visible-light photocatalytic hydrogen evolution and  
degradation of organic pollutant**

Qian Liang<sup>a</sup>, Jie Jin<sup>a</sup>, Changhai Liu<sup>b</sup>, Song Xu<sup>a</sup>, Chao Yao<sup>a</sup>, Zhongyu Li<sup>a,\*</sup>

<sup>a</sup> School of Petrochemical Engineering, Changzhou University, Changzhou 213164,  
PR China.

<sup>b</sup> School of Materials Science & Engineering, Jiangsu Collaborative Innovation Center  
of Photovoltaic Science and Engineering, Changzhou University, Changzhou 213164,  
PR China.

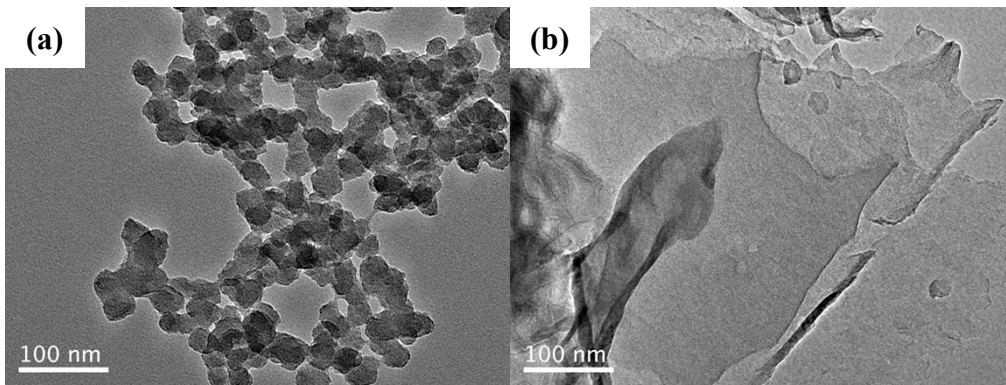

**Fig. S1.** TEM images of (a) UIO-66 and (b) g-C<sub>3</sub>N<sub>4</sub> nanosheet.

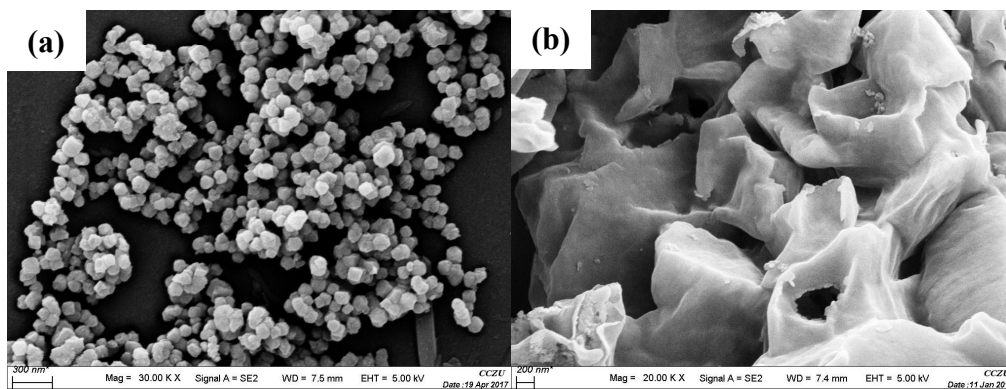

**Fig. S2.** SEM images of (a) UIO-66 and (b) g-C<sub>3</sub>N<sub>4</sub> nanosheet.

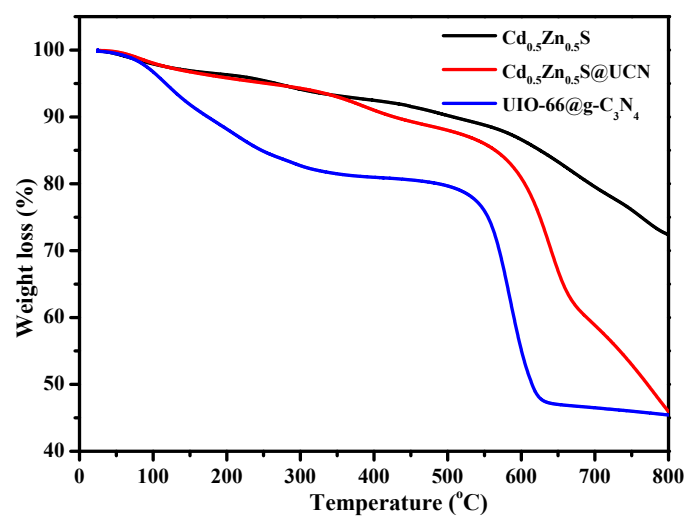

**Fig. S3.** TGA curves of UIO-66@g-C<sub>3</sub>N<sub>4</sub>, Cd<sub>0.5</sub>Zn<sub>0.5</sub>S and Cd<sub>0.5</sub>Zn<sub>0.5</sub>S@UCN.

**Table S1.** Porous characteristics of the as-prepared samples.

| Sample                                      | S <sub>BET</sub> (m <sup>2</sup> g <sup>-1</sup> ) | S <sub>Langmuir</sub> (m <sup>2</sup> g <sup>-1</sup> ) | Pore volume (cm <sup>3</sup> g <sup>-1</sup> ) |
|---------------------------------------------|----------------------------------------------------|---------------------------------------------------------|------------------------------------------------|
| UIO-66                                      | 948                                                | 1345                                                    | 0.76                                           |
| g-C <sub>3</sub> N <sub>4</sub>             | 15                                                 | 27                                                      | 0.04                                           |
| UIO-66@g-C <sub>3</sub> N <sub>4</sub>      | 270                                                | 446                                                     | 0.19                                           |
| Cd <sub>0.5</sub> Zn <sub>0.5</sub> S@UCN30 | 147                                                | 233                                                     | 0.11                                           |
